# Supplementary material for: Transition-metal(ii) complexes with a tripodal hexadentate ligand, 1,1,1-tris[2-aza-3-(imidazol-4-yl)prop-2-enyl]ethane, exhibiting incomplete total or absolute spontaneous resolution
Source: Royal Society of Chemistry journal article supplement (doi:10.1039/c9ce01864f), 2019-12-06
Supplement: c9ce01864f1.pdf [file c9ce01864f1.pdf]

**Transition-metal(II) complexes with a tripodal hexadentate ligand, 1,1,1-tris[2-aza-3-(imidazol-4-yl)prop-2-enyl]ethane, exhibiting incomplete total or absolute spontaneous resolution**

Misaki Matsushima,<sup>a</sup> Koki Wada,<sup>a</sup> Yuki Horino,<sup>a</sup> Kazuma Takahara,<sup>a</sup> Yukinari Sunatsuki <sup>a</sup> and  
Takayoshi Suzuki <sup>\*ab</sup>

<sup>a</sup> Graduate School of Natural Science and Technology, Okayama University, Okayama 700-8530,  
Japan.

<sup>b</sup> Research Institute for Interdisciplinary Science, Okayama University, Okayama 700-8530, Japan.

E-mail: [suzuki@okayama-u.ac.jp](mailto:suzuki@okayama-u.ac.jp)

## Contents:

- Fig. S1** Temperature-dependence of the magnetic susceptibility,  $\chi_M T$  vs.  $T$  plots of [Mn(H<sub>3</sub>L)]Cl(ClO<sub>4</sub>) (**1**: yellow), (b) [Fe(H<sub>3</sub>L)]Cl(ClO<sub>4</sub>) (**2**: red), (c) [Co(H<sub>3</sub>L)]Cl(ClO<sub>4</sub>) (**3**: blue) and [Ni(H<sub>3</sub>L)]Cl(ClO<sub>4</sub>) (**4**: purple).
- Fig. S2** FT-IR spectra of (a) [Mn(H<sub>3</sub>L)]Cl(ClO<sub>4</sub>) (**1**), (b) [Fe(H<sub>3</sub>L)]Cl(ClO<sub>4</sub>) (**2**), (c) [Co(H<sub>3</sub>L)]Cl(ClO<sub>4</sub>) (**3**), (d) [Ni(H<sub>3</sub>L)]Cl(ClO<sub>4</sub>) (**4**) and (e) [Zn(H<sub>3</sub>L)]Cl(ClO<sub>4</sub>) (**5**).
- Fig. S3** UV-vis absorption spectra of (a) [Mn(H<sub>3</sub>L)]Cl(ClO<sub>4</sub>) (**1**: red), (b) [Fe(H<sub>3</sub>L)]Cl(ClO<sub>4</sub>) (**2**: dark blue), (c) [Co(H<sub>3</sub>L)]Cl(ClO<sub>4</sub>) (**3**: purple), (d) [Ni(H<sub>3</sub>L)]Cl(ClO<sub>4</sub>) (**4**: green) and (e) [Zn(H<sub>3</sub>L)]Cl(ClO<sub>4</sub>) (**5**: sky blue) in methanol.
- Fig. S4** ORTEP drawings (50% probability level) of (a) [Co(H<sub>3</sub>L)]Cl(ClO<sub>4</sub>) (**3**), (b) [Ni(H<sub>3</sub>L)]Cl(ClO<sub>4</sub>) (**4**) and (c) [Co(H<sub>3</sub>L)]Cl(ClO<sub>4</sub>) (**5**) with atom-numbering schemes.
- Fig. S5** An ORTEP drawing (50% probability level) of crystallographically independent complex cations, counter anions, and a hydrated water molecules in [Fe(H<sub>3</sub>L)](ClO<sub>4</sub>)<sub>2</sub>•0.5H<sub>2</sub>O (**2A**) with atom-numbering schemes.
- Fig. S6** A packing diagram viewed along the  $a$  axis of [Fe(H<sub>3</sub>L)](ClO<sub>4</sub>)<sub>2</sub>•0.5H<sub>2</sub>O (**2A**).
- Fig. S7** A CD spectrum of a methanol solution dissolving a piece of single-crystal of [Fe(H<sub>3</sub>L)]Cl(ClO<sub>4</sub>) (**2**).
- Fig. S8** The observed powder X-ray diffraction (PXRD) spectra (upper, black) of the micro-crystalline samples obtained by recrystallisation and the simulated PXRD pattern (lower, green) from the single-crystal X-ray analyses for [M(H<sub>3</sub>L)]Cl(ClO<sub>4</sub>) (M = Mn (a), Fe (b), Ni (c) and Zn (d)).
- Fig. S9** Preparation of a sample disk for solid-state CD measurement. A mixture of sample and KBr was well ground in an agate mortar (a) then vacuum pressed (b) to form a uniform disk. The disk was placed in a sample holder (c), which was then positioned in the cell holder of the spectropolarimeter (d).
- Table S1** Crystallographic data for compounds **1–5**.
- Table S2** Crystallographic data for compound **2A**.
- Table S3** Comparison of structural parameters ( $l/\text{Å}$ ,  $\phi/^\circ$ ) for compounds **2** and **2A**.
- Table S4** Hydrogen bonding parameters ( $l/\text{Å}$ ,  $\phi/^\circ$ ) in compounds **1–5** and **2A**.

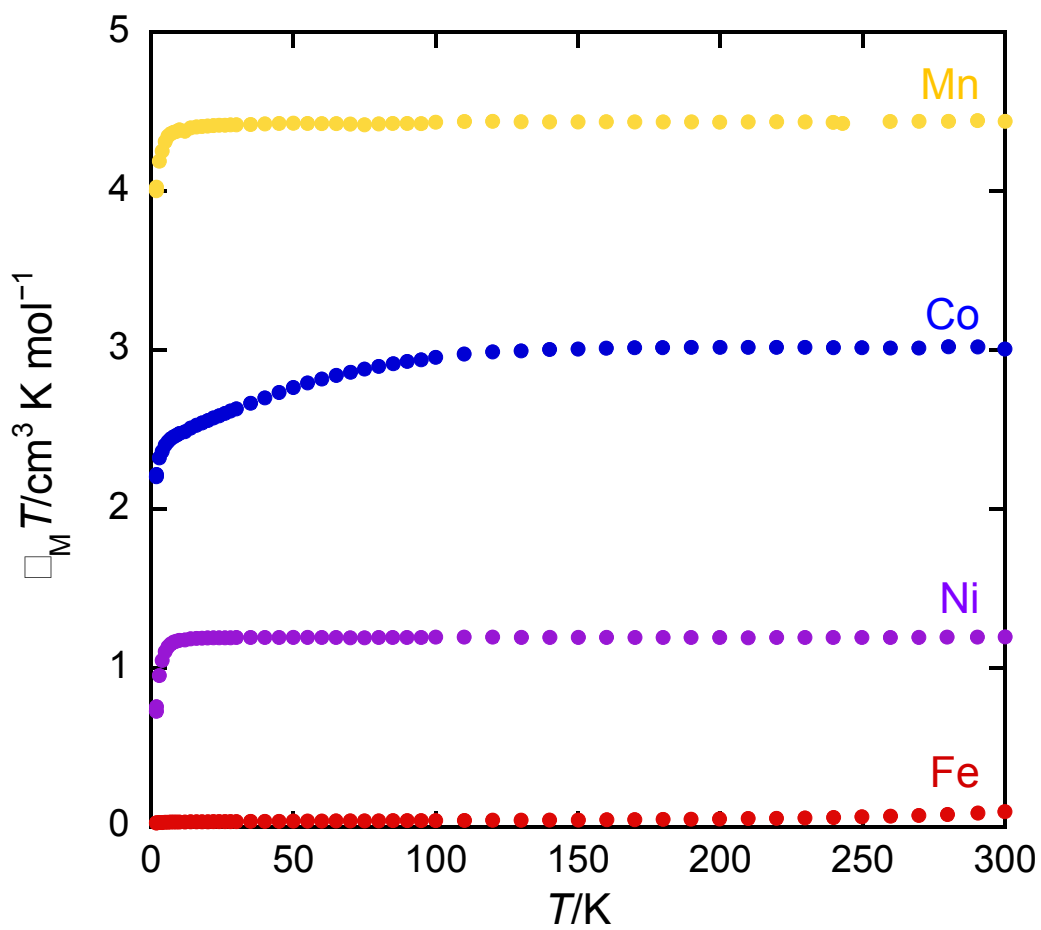

**Fig. S1** Temperature-dependence of the magnetic susceptibility,  $\chi_M T$  vs.  $T$  plots of [Mn(H<sub>3</sub>L)]Cl(ClO<sub>4</sub>) (1: yellow), (b) [Fe(H<sub>3</sub>L)]Cl(ClO<sub>4</sub>) (2: red), (c) [Co(H<sub>3</sub>L)]Cl(ClO<sub>4</sub>) (3: blue) and [Ni(H<sub>3</sub>L)]Cl(ClO<sub>4</sub>) (4: purple).

(a)

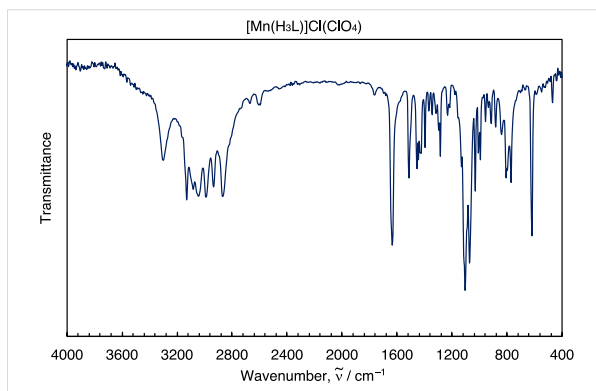

(b)

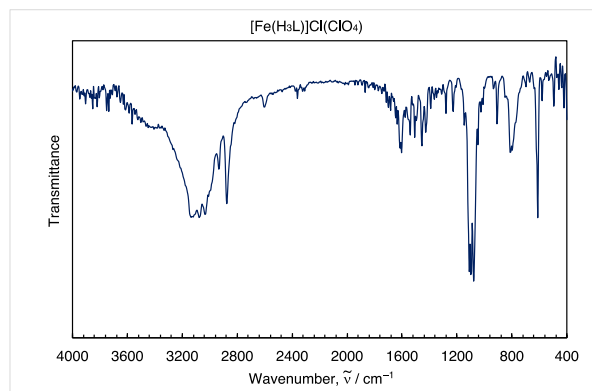

(c)

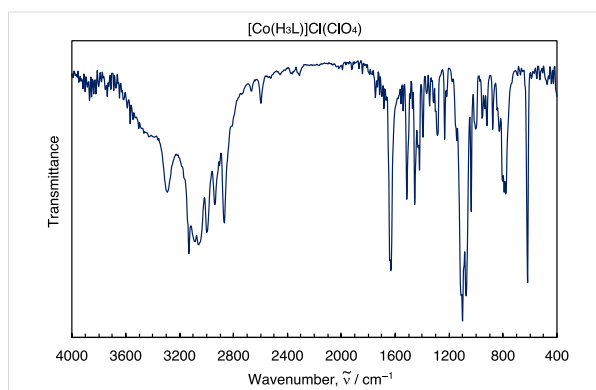

(d)

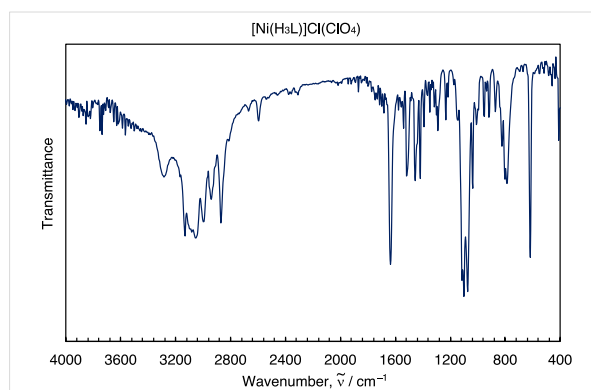

(e)

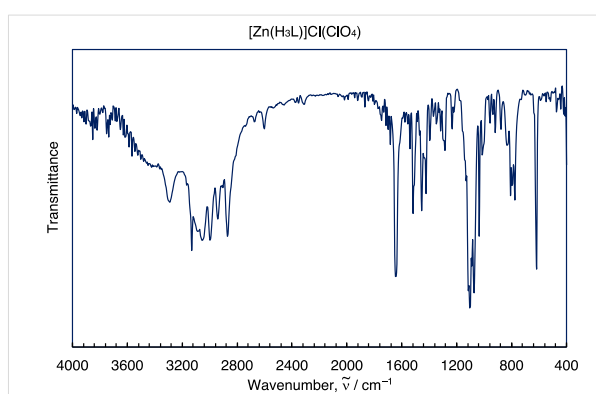

**Fig. S2** FT-IR spectra of (a) [Mn(H<sub>3</sub>L)]Cl(ClO<sub>4</sub>) (1), (b) [Fe(H<sub>3</sub>L)]Cl(ClO<sub>4</sub>) (2), (c) [Co(H<sub>3</sub>L)]Cl(ClO<sub>4</sub>) (3), (d) [Ni(H<sub>3</sub>L)]Cl(ClO<sub>4</sub>) (4) and (e) [Zn(H<sub>3</sub>L)]Cl(ClO<sub>4</sub>) (5).

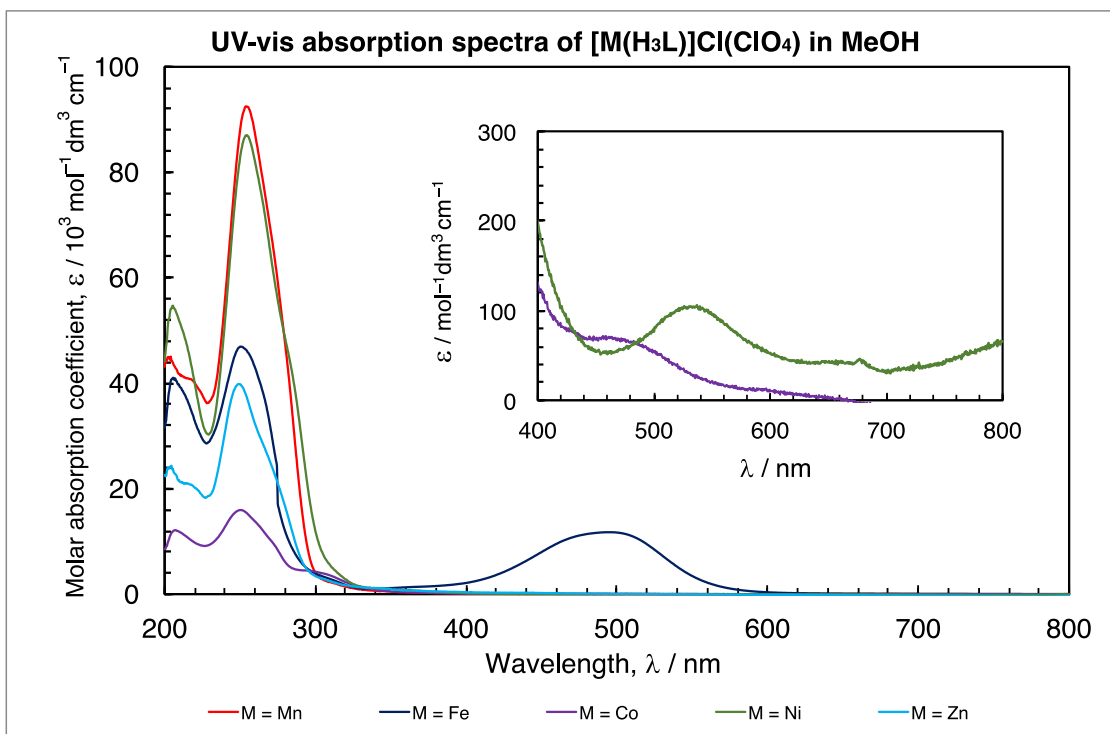

**Fig. S3** UV-vis absorption spectra of (a) [Mn(H<sub>3</sub>L)]Cl(ClO<sub>4</sub>) (**1**: red), (b) [Fe(H<sub>3</sub>L)]Cl(ClO<sub>4</sub>) (**2**: dark blue), (c) [Co(H<sub>3</sub>L)]Cl(ClO<sub>4</sub>) (**3**: purple), (d) [Ni(H<sub>3</sub>L)]Cl(ClO<sub>4</sub>) (**4**: green) and (e) [Zn(H<sub>3</sub>L)]Cl(ClO<sub>4</sub>) (**5**: sky blue) in methanol.

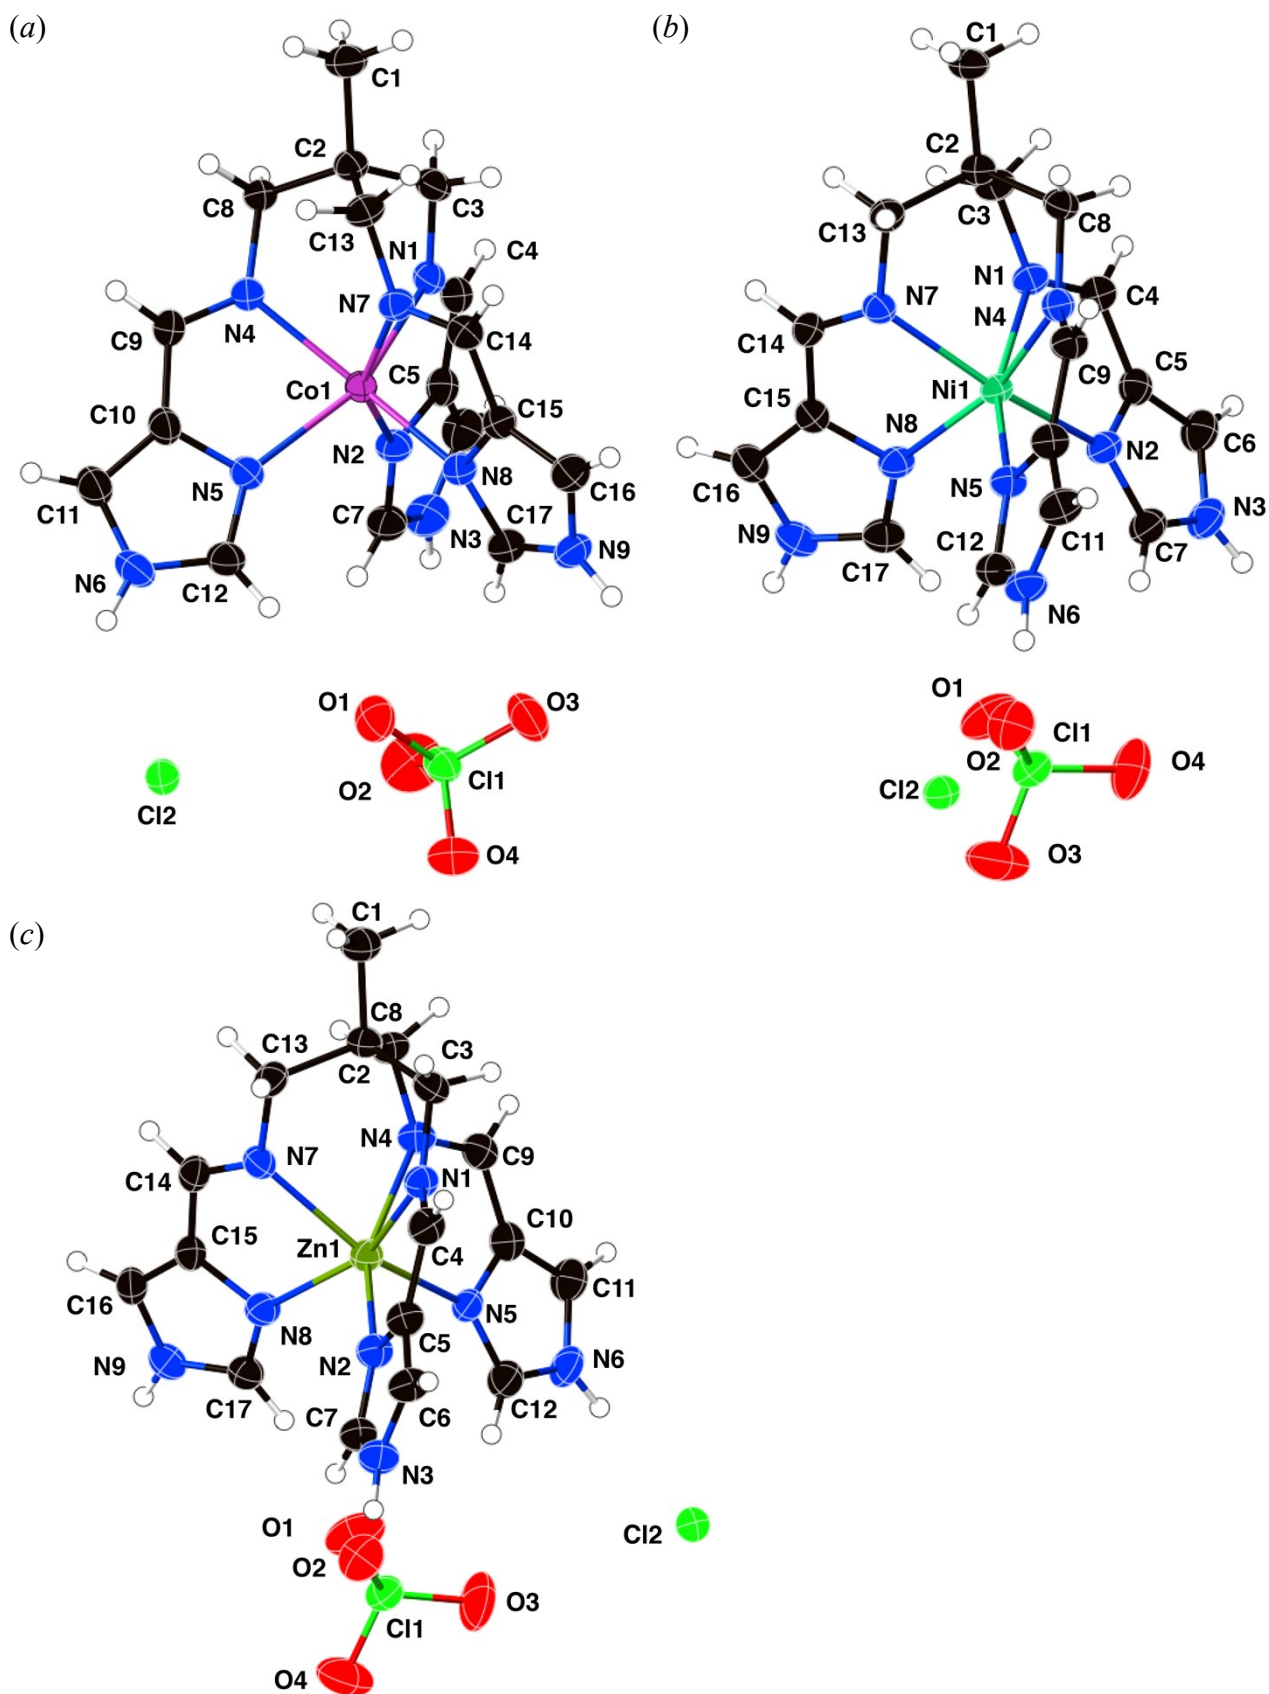

**Fig. S4** ORTEP drawings (50% probability level) of (a)  $[\text{Co}(\text{H}_3\text{L})]\text{Cl}(\text{ClO}_4)$  (**3**), (b)  $[\text{Ni}(\text{H}_3\text{L})]\text{Cl}(\text{ClO}_4)$  (**4**) and (c)  $[\text{Zn}(\text{H}_3\text{L})]\text{Cl}(\text{ClO}_4)$  (**5**) with atom-numbering schemes.

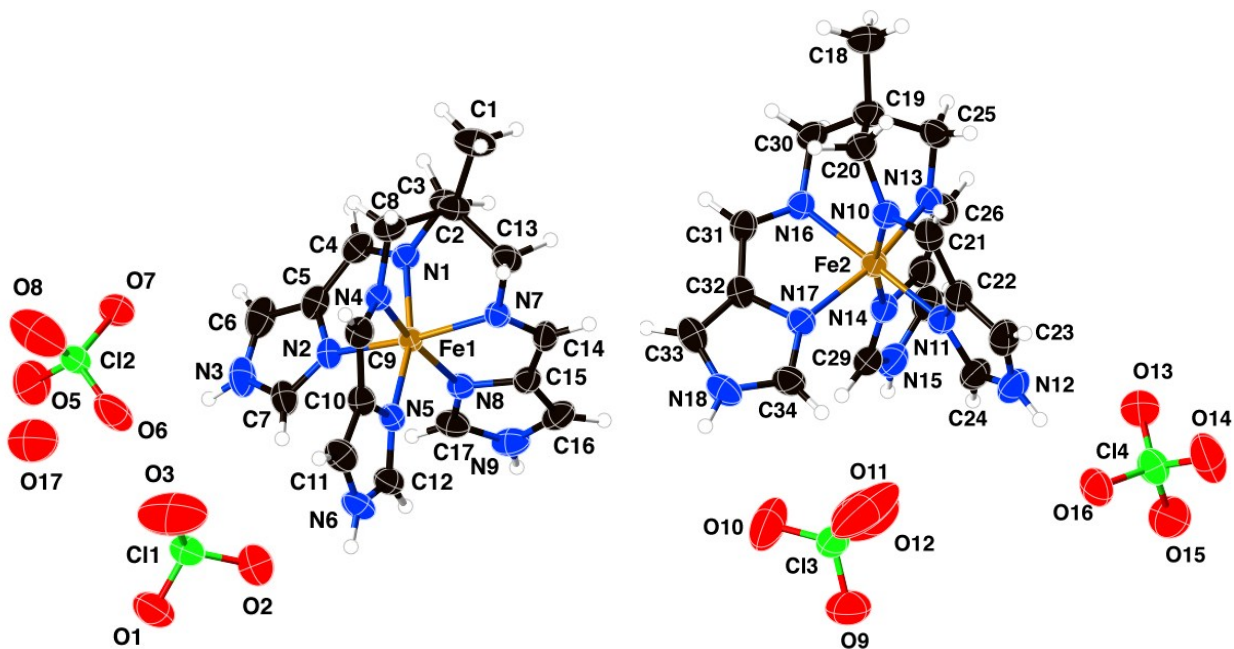

**Fig. S5** An ORTEP drawing (50% probability level) of crystallographically independent complex cations, counter anions, and a hydrated water molecules in  $[\text{Fe}(\text{H}_3\text{L})](\text{ClO}_4)_2 \cdot 0.5\text{H}_2\text{O}$  (2A) with atom-numbering schemes.

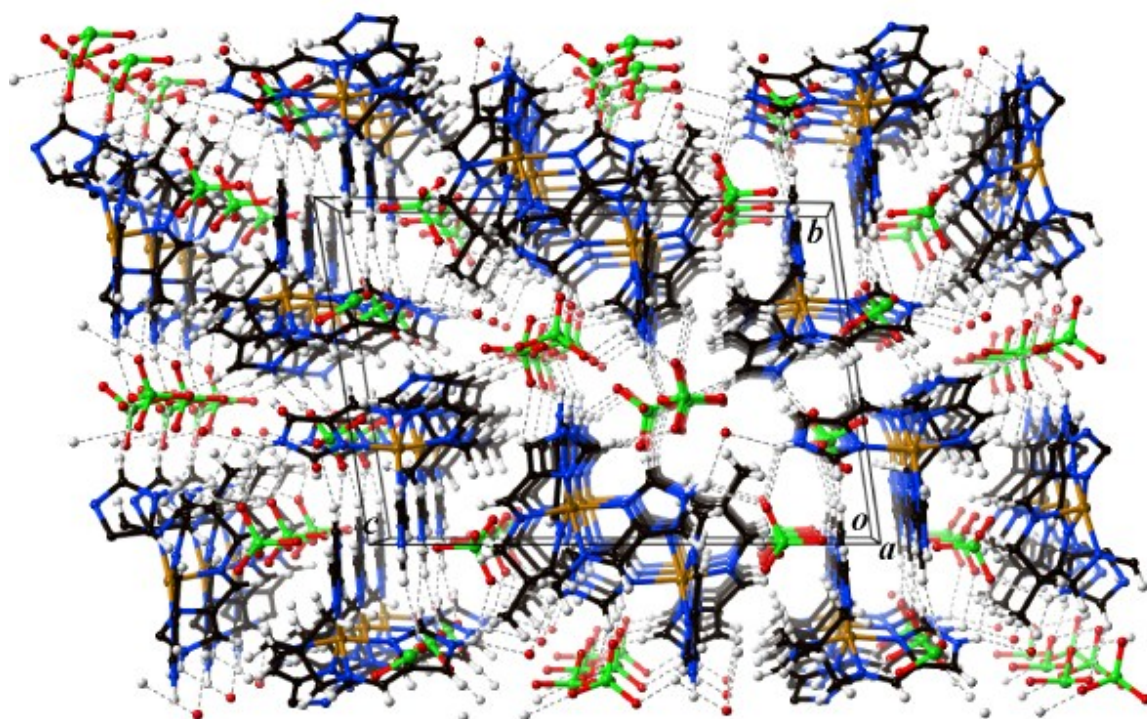

**Fig. S6** A packing diagram viewed along the  $a$  axis of  $[\text{Fe}(\text{H}_3\text{L})](\text{ClO}_4)_2 \cdot 0.5\text{H}_2\text{O}$  (2A).

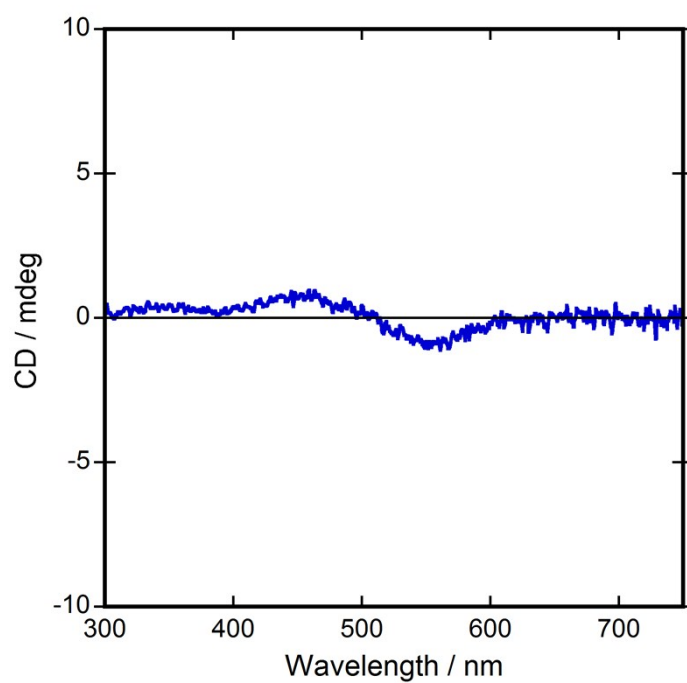

**Fig. S7** A CD spectrum of a methanol solution dissolving a piece of single-crystal of [Fe(H<sub>3</sub>L)]Cl(ClO<sub>4</sub>) (**2**).



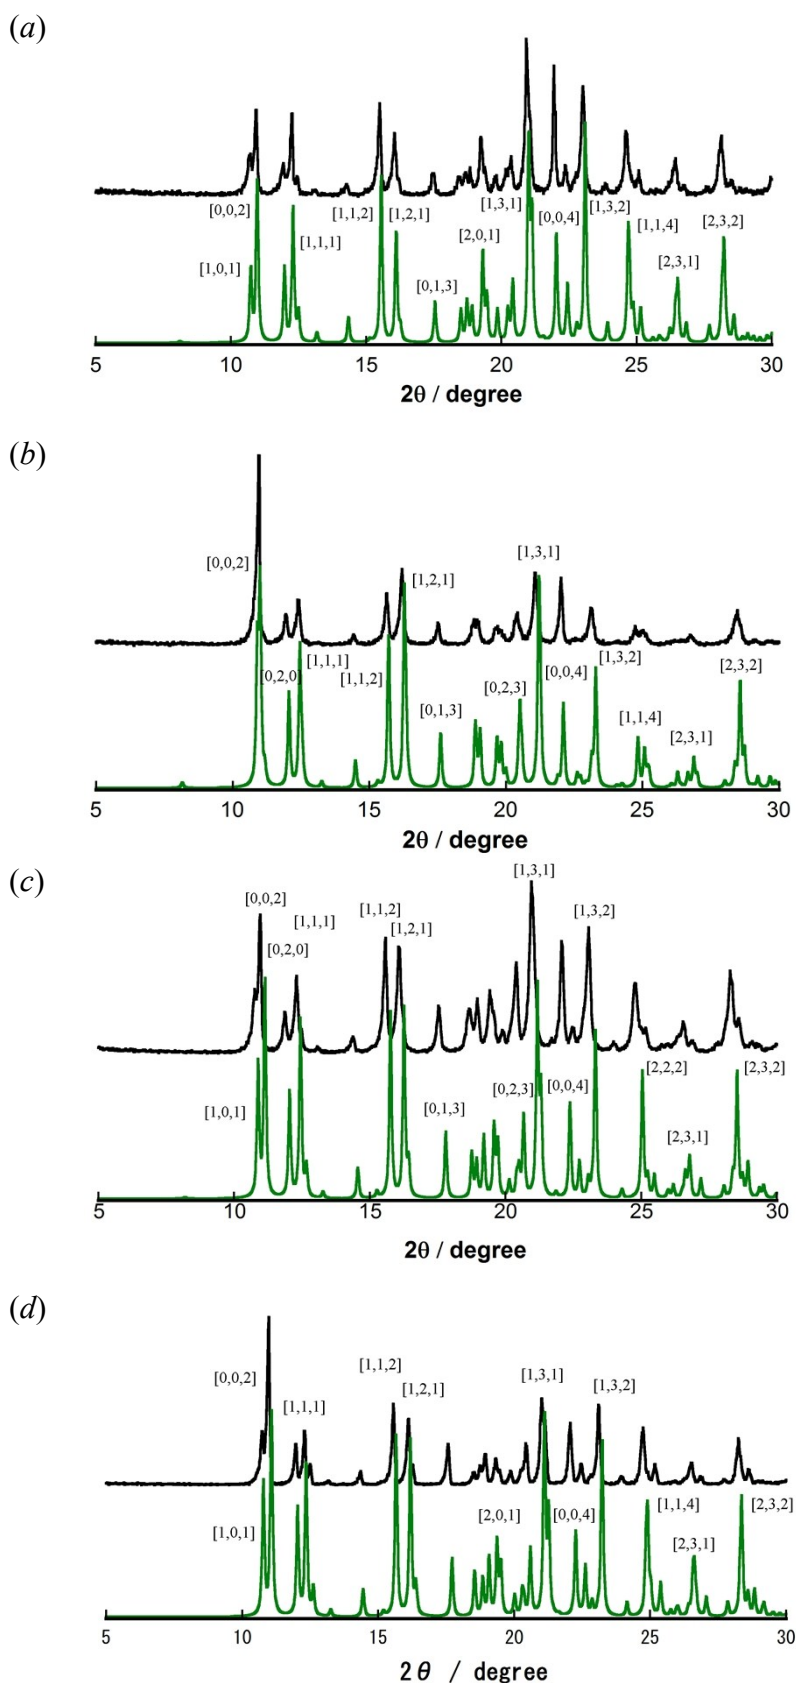

**Fig. S8** The observed powder X-ray diffraction (PXRD) spectra (upper, black) of the microcrystalline samples obtained by recrystallisation and the simulated PXRD pattern (lower, green) from the single-crystal X-ray analyses for  $[M(H_3L)]Cl(ClO_4)$  ( $M = Mn$  (a),  $Fe$  (b),  $Ni$  (c) and  $Zn$  (d)).

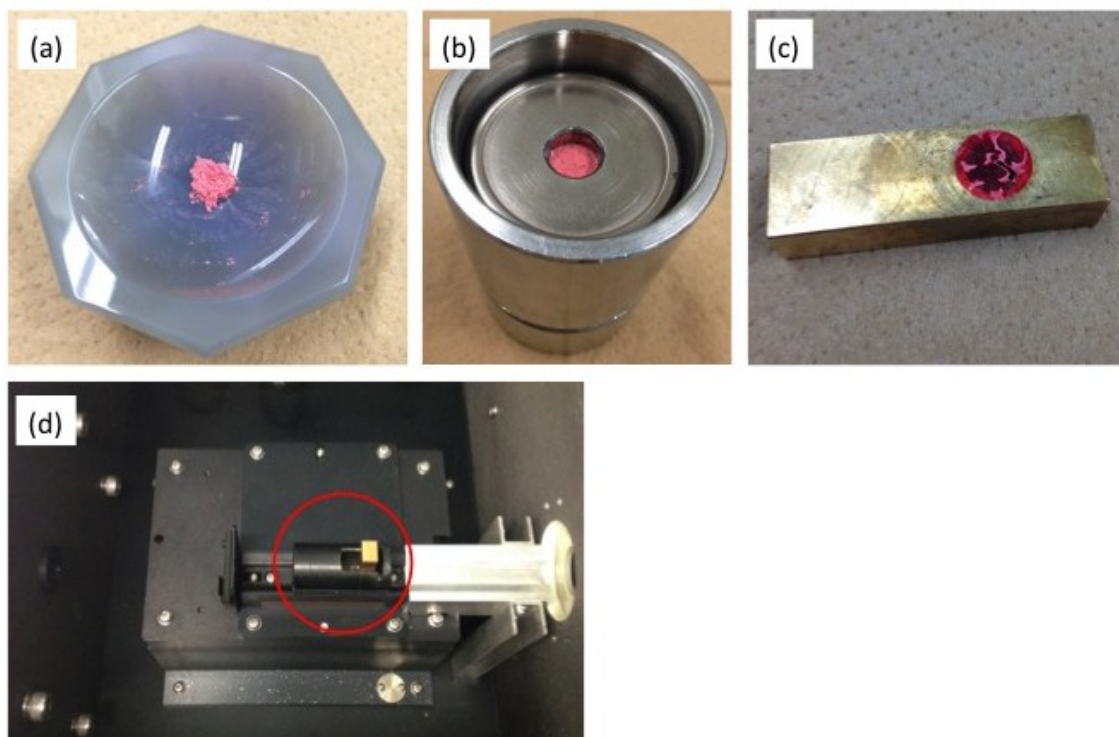

**Fig. S9** Preparation of a sample disk for solid-state CD measurement. A mixture of sample and KBr was well ground in an agate mortar (*a*) then vacuum pressed (*b*) to form a uniform disk. The disk was placed in a sample holder (*c*), which was then positioned in the cell holder of the spectropolarimeter (*d*).

**Table S1** Crystallographic data for compounds **1–5**.

| Complex                                                                                                             | <b>1</b>                                                                        | <b>2</b>                                                                        | <b>3</b>                                                                        | <b>4</b>                                                                        | <b>5</b>                                                                         |
|---------------------------------------------------------------------------------------------------------------------|---------------------------------------------------------------------------------|---------------------------------------------------------------------------------|---------------------------------------------------------------------------------|---------------------------------------------------------------------------------|----------------------------------------------------------------------------------|
|                                                                                                                     | [Mn(H <sub>3</sub> L)]Cl(ClO <sub>4</sub> )                                     | [Fe(H <sub>3</sub> L)]Cl(ClO <sub>4</sub> )                                     | [Co(H <sub>3</sub> L)]Cl(ClO <sub>4</sub> )                                     | [Ni(H <sub>3</sub> L)]Cl(ClO <sub>4</sub> )                                     | [Zn(H <sub>3</sub> L)]Cl(ClO <sub>4</sub> )                                      |
| Chemical formula                                                                                                    | C <sub>17</sub> H <sub>21</sub> Cl <sub>2</sub> MnN <sub>9</sub> O <sub>4</sub> | C <sub>17</sub> H <sub>21</sub> Cl <sub>2</sub> FeN <sub>9</sub> O <sub>4</sub> | C <sub>17</sub> H <sub>21</sub> Cl <sub>2</sub> CoN <sub>9</sub> O <sub>4</sub> | C <sub>17</sub> H <sub>21</sub> Cl <sub>2</sub> N <sub>9</sub> NiO <sub>4</sub> | C <sub>17</sub> H <sub>21</sub> Cl <sub>2</sub> N <sub>9</sub> O <sub>4</sub> Zn |
| Formula weight                                                                                                      | 541.25                                                                          | 542.18                                                                          | 545.26                                                                          | 545.04                                                                          | 551.70                                                                           |
| <i>T</i> / K                                                                                                        | 192(2)                                                                          | 193(2)                                                                          | 192(2)                                                                          | 192(2)                                                                          | 192(2)                                                                           |
| Crystal color and shape                                                                                             | yellow, platelet                                                                | red, platelet                                                                   | brown, platelet                                                                 | purple, platelet                                                                | colorless, block                                                                 |
| Size of specimen / mm                                                                                               | 0.5 × 0.3 × 0.1                                                                 | 0.3 × 0.2 × 0.05                                                                | 0.4 × 0.25 × 0.1                                                                | 0.35 × 0.25 × 0.1                                                               | 0.2 × 0.1 × 0.1                                                                  |
| Crystal system                                                                                                      | orthorhombic                                                                    | orthorhombic                                                                    | orthorhombic                                                                    | orthorhombic                                                                    | orthorhombic                                                                     |
| Space group, <i>Z</i>                                                                                               | <i>P</i> 2 <sub>1</sub> 2 <sub>1</sub> 2 <sub>1</sub> , 4                       | <i>P</i> 2 <sub>1</sub> 2 <sub>1</sub> 2 <sub>1</sub> , 4                       | <i>P</i> 2 <sub>1</sub> 2 <sub>1</sub> 2 <sub>1</sub> , 4                       | <i>P</i> 2 <sub>1</sub> 2 <sub>1</sub> 2 <sub>1</sub> , 4                       | <i>P</i> 2 <sub>1</sub> 2 <sub>1</sub> 2 <sub>1</sub> , 4                        |
| <i>a</i> / Å                                                                                                        | 9.5820(9)                                                                       | 9.396(4)                                                                        | 9.5465(6)                                                                       | 9.4888(7)                                                                       | 9.5605(8)                                                                        |
| <i>b</i> / Å                                                                                                        | 14.7653(13)                                                                     | 14.669(7)                                                                       | 14.6856(10)                                                                     | 14.7278(9)                                                                      | 14.6922(11)                                                                      |
| <i>c</i> / Å                                                                                                        | 16.1241(12)                                                                     | 16.074(7)                                                                       | 15.9616(12)                                                                     | 15.9298(10)                                                                     | 15.9600(14)                                                                      |
| <i>α</i> / °                                                                                                        | 90                                                                              | 90                                                                              | 90                                                                              | 90                                                                              | 90                                                                               |
| <i>β</i> / °                                                                                                        | 90                                                                              | 90                                                                              | 90                                                                              | 90                                                                              | 90                                                                               |
| <i>γ</i> / °                                                                                                        | 90                                                                              | 90                                                                              | 90                                                                              | 90                                                                              | 90                                                                               |
| <i>U</i> / Å <sup>3</sup>                                                                                           | 2281.2(3)                                                                       | 2215.5(16)                                                                      | 2237.8(3)                                                                       | 2226.2(2)                                                                       | 2241.8(3)                                                                        |
| <i>D</i> <sub>calc</sub> / g cm <sup>-3</sup>                                                                       | 1.576                                                                           | 1.625                                                                           | 1.618                                                                           | 1.626                                                                           | 1.635                                                                            |
| <i>μ</i> (Mo Kα) / mm <sup>-1</sup>                                                                                 | 0.858                                                                           | 0.968                                                                           | 1.051                                                                           | 1.157                                                                           | 1.379                                                                            |
| <i>R</i> <sub>int</sub>                                                                                             | 0.0519                                                                          | 0.0383                                                                          | 0.0356                                                                          | 0.0363                                                                          | 0.0986                                                                           |
| No. reflns / params.                                                                                                | 5194/298                                                                        | 5052/298                                                                        | 5116/298                                                                        | 5069/299                                                                        | 5110/298                                                                         |
| <i>R</i> 1 ( <i>F</i> <sup>2</sup> : <i>F</i> <sub>o</sub> <sup>2</sup> > 2σ( <i>F</i> <sub>o</sub> <sup>2</sup> )) | 0.0295                                                                          | 0.0312                                                                          | 0.0248                                                                          | 0.0228                                                                          | 0.0462                                                                           |
| <i>wR</i> 2 ( <i>F</i> <sup>2</sup> : all data)                                                                     | 0.0733                                                                          | 0.0765                                                                          | 0.0613                                                                          | 0.0553                                                                          | 0.0956                                                                           |
| GoF                                                                                                                 | 1.048                                                                           | 0.992                                                                           | 1.048                                                                           | 1.058                                                                           | 1.015                                                                            |
| Flack param.                                                                                                        | 0.003(7)                                                                        | 0.032(7)                                                                        | −0.009(5)                                                                       | 0.001(5)                                                                        | −0.005(12)                                                                       |

**Table S2** Crystallographic data for compound **2A**.

| Complex                                   | <b>2A</b>                                                                        |
|-------------------------------------------|----------------------------------------------------------------------------------|
|                                           | $\{[\text{Fe}(\text{H}_3\text{L})](\text{ClO}_4)_2\}_2 \cdot \text{H}_2\text{O}$ |
| Chemical formula                          | $\text{C}_{34}\text{H}_{44}\text{Cl}_4\text{Fe}_2\text{N}_{18}\text{O}_{17}$     |
| Formula weight                            | 1230.37                                                                          |
| $T / \text{K}$                            | 192(2)                                                                           |
| Crystal color and shape                   | red, platelet                                                                    |
| Size of specimen / mm                     | $0.5 \times 0.4 \times 0.2$                                                      |
| Crystal system                            | triclinic                                                                        |
| Space group, $Z$                          | $P\bar{1}, 2$                                                                    |
| $a / \text{\AA}$                          | 10.2032(3)                                                                       |
| $b / \text{\AA}$                          | 12.8833(5)                                                                       |
| $c / \text{\AA}$                          | 19.1031(6)                                                                       |
| $\alpha / ^\circ$                         | 80.2128(17)                                                                      |
| $\beta / ^\circ$                          | 79.7746(12)                                                                      |
| $\gamma / ^\circ$                         | 80.6301(16)                                                                      |
| $U / \text{\AA}^3$                        | 2412.38(14)                                                                      |
| $D_{\text{calc}} / \text{g cm}^{-3}$      | 1.694                                                                            |
| $\mu(\text{Mo K}\alpha) / \text{mm}^{-1}$ | 0.913                                                                            |
| $R_{\text{int}}$                          | 0.0303                                                                           |
| No. reflns / params.                      | 11031/676                                                                        |
| $R1 (F^2: F_o^2 > 2\sigma(F_o^2))$        | 0.0576                                                                           |
| $wR2 (F^2: \text{all data})$              | 0.1719                                                                           |
| GoF                                       | 1.019                                                                            |

**Table S3** Comparison of structural parameters ( $l/\text{\AA}$ ,  $\phi^\circ$ ) for compounds **2** and **2A**.

| Parameter <sup>a</sup> | <b>2</b>                                                                 | <b>2A(mol1)</b>                                                         | <b>2A(mol2)</b>                                                         |
|------------------------|--------------------------------------------------------------------------|-------------------------------------------------------------------------|-------------------------------------------------------------------------|
| M–N(a)                 | 1.941(3), 1.951(3), 1.935(3)                                             | 1.934(2), 1.932(2), 1.942(2)                                            | 1.927(3), 1.942(2), 1.955(2)                                            |
| M–N(b)                 | 1.979(3), 1.974(3), 1.990(3)                                             | 1.972(2), 1.989(2), 1.972(2)                                            | 1.987(3), 1.986(3), 1.981(2)                                            |
| C(a)–C(b)              | 1.546(5)                                                                 | 1.531(4)                                                                | 1.529(4)                                                                |
| C(b)–C(c)              | 1.546(5), 1.539(5), 1.542(5)                                             | 1.540(4), 1.532(5), 1.550(4)                                            | 1.547(4), 1.558(4), 1.545(4)                                            |
| N(a)–C(c)              | 1.476(4), 1.460(4), 1.474(4)                                             | 1.465(4), 1.466(4), 1.467(4)                                            | 1.471(4), 1.467(4), 1.460(4)                                            |
| N(a)–C(d)              | 1.296(4), 1.285(5), 1.299(4)                                             | 1.286(4), 1.281(4), 1.290(4)                                            | 1.294(4), 1.284(4), 1.284(4)                                            |
| C(d)–C(e)              | 1.429(5), 1.424(5), 1.422(5)                                             | 1.437(5), 1.433(4), 1.430(4)                                            | 1.434(5), 1.439(5), 1.432(4)                                            |
| N(b)–C(e)              | 1.396(4), 1.387(5), 1.391(4)                                             | 1.385(4), 1.395(4), 1.385(4)                                            | 1.387(5), 1.392(4), 1.386(4)                                            |
| C(e)–C(f)              | 1.367(5), 1.362(6), 1.365(5)                                             | 1.373(4), 1.367(4), 1.371(4)                                            | 1.382(4), 1.361(5), 1.367(4)                                            |
| N(b)–C(g)              | 1.327(4), 1.315(4), 1.327(4)                                             | 1.320(4), 1.315(4), 1.319(4)                                            | 1.316(4), 1.313(4), 1.318(4)                                            |
| N(c)–C(g)              | 1.344(5), 1.349(5), 1.344(5)                                             | 1.349(5), 1.357(4), 1.347(4)                                            | 1.358(5), 1.342(5), 1.345(5)                                            |
| N(c)–C(f)              | 1.369(5), 1.344(6), 1.367(5)                                             | 1.350(5), 1.355(5), 1.358(5)                                            | 1.357(6), 1.370(5), 1.354(5)                                            |
| N(a)–M–N(b)            | 80.93(11), 81.03(13), 80.73(11)                                          | 81.54(10), 81.00(10), 80.78(10)                                         | 81.29(11), 81.20(11), 80.88(10)                                         |
| N(a)–M–N(a')           | 86.47(12), 86.84(11), 87.41(12)                                          | 87.47(10), 88.12(10), 86.71(10)                                         | 86.95(11), 86.38(10), 86.27(11)                                         |
| N(a)–M–N(b')           | 164.52(12), 163.36(12), 165.70(11)<br>100.73(12), 102.05(12), 102.60(12) | 164.14(10), 167.32(10), 164.99(10)<br>97.92(10), 100.59(10), 103.64(10) | 165.76(11), 165.02(11), 165.23(11)<br>99.96(10), 100.79(10), 100.75(11) |
| N(b)–M–N(b')           | 90.64(12), 93.42(12), 92.75(12)                                          | 89.88(10), 95.61(10), 91.59(10)                                         | 93.15(12), 93.42(11), 93.43(11)                                         |
| C(a)–C(b)–C(c)–N(a)    | –162.4(3), –161.5(3), –162.5(3)                                          | 161.7(3), 162.1(3), 162.1(3)                                            | 160.2(3), 161.9(3), 159.6(3)                                            |
| M–N(a)–C(c)–C(b)       | –32.0(4), –33.5(4), –31.4(4)                                             | 32.2(3), 31.2(3), 33.6(3)                                               | 35.7(3), 34.9(3), 35.3(3)                                               |
| N(b)–M–N(a)–C(c)       | 165.6(2), 164.7(2), 163.2(2)                                             | –163.5(2), –164.8(2), –162.4(2)                                         | –165.4(2), –164.7(2), –164.5(2)                                         |

<sup>a</sup> The abbreviations of atoms are:

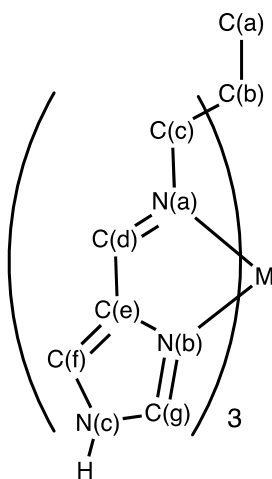

**Table S4** Hydrogen bonding parameters ( $l/\text{\AA}$ ,  $\phi/^\circ$ ) in compounds **1–5** and **2A**.

| D–H $\cdots$ A       | D–H   | H $\cdots$ A | D $\cdots$ A | D–H–A | symmetry code for A   |
|----------------------|-------|--------------|--------------|-------|-----------------------|
| <b>Compound 1</b>    |       |              |              |       |                       |
| N3–H3 $\cdots$ Cl2   | 0.860 | 2.313        | 3.109(3)     | 154.0 | $-x+2, y+1/2, -z+3/2$ |
| N6–H6 $\cdots$ O1    | 0.860 | 2.184        | 2.915(4)     | 142.8 | $-x+2, y-1/2, -z+3/2$ |
| N9–H9 $\cdots$ Cl2   | 0.860 | 2.252        | 3.073(2)     | 159.5 | $x+1/2, -y+3/2, -z+1$ |
| <b>Compound 2</b>    |       |              |              |       |                       |
| N3–H3 $\cdots$ Cl2   | 0.880 | 2.249        | 3.110(3)     | 165.8 | $-x, y+1/2, -z+3/2$   |
| N6–H6 $\cdots$ Cl2   | 0.880 | 2.306        | 3.115(4)     | 152.8 | $x+1/2, -y+3/2, -z+1$ |
| N9–H9 $\cdots$ Cl2   | 0.880 | 2.424        | 3.195(4)     | 146.5 | ...                   |
| <b>Compound 3</b>    |       |              |              |       |                       |
| N3–H3 $\cdots$ Cl2   | 0.880 | 2.279        | 3.121(3)     | 160.0 | $x-1, y, z$           |
| N6–H6 $\cdots$ Cl2   | 0.880 | 2.588        | 3.249(2)     | 132.6 | $-x+1, y-1/2, -z+1/2$ |
| N6–H6 $\cdots$ O2    | 0.880 | 2.253        | 2.935(4)     | 134.2 | $-x+1, y-1/2, -z+1/2$ |
| N9–H9 $\cdots$ Cl2   | 0.880 | 2.264        | 3.090(2)     | 156.2 | $-x+3/2, -y+2, z-1/2$ |
| <b>Compound 4</b>    |       |              |              |       |                       |
| N3–H7 $\cdots$ Cl2   | 0.880 | 2.275        | 3.121(2)     | 161.1 | ...                   |
| N6–H9 $\cdots$ Cl2   | 0.880 | 2.534        | 3.215(2)     | 134.8 | $-x+2, y+1/2, -z+3/2$ |
| N6–H9 $\cdots$ O4    | 0.880 | 2.308        | 2.953(3)     | 130.2 | $-x+2, y+1/2, -z+3/2$ |
| N9–H8 $\cdots$ Cl2   | 0.880 | 2.268        | 3.095(2)     | 156.5 | $-x+3/2, -y, z+1/2$   |
| <b>Compound 5</b>    |       |              |              |       |                       |
| N3–H3 $\cdots$ Cl2   | 0.880 | 2.246        | 3.080(5)     | 157.9 | $x-1/2, -y+1/2, -z+1$ |
| N6–H6 $\cdots$ Cl2   | 0.880 | 2.611        | 3.252(5)     | 130.5 | ...                   |
| N6–H6 $\cdots$ O3    | 0.880 | 2.233        | 2.930(7)     | 135.9 | $-x+2, y-1/2, -z+3/2$ |
| N9–H9 $\cdots$ Cl2   | 0.880 | 2.287        | 3.122(5)     | 158.4 | $-x+2, y+1/2, -z+3/2$ |
| <b>Compound 2A</b>   |       |              |              |       |                       |
| N3–H3 $\cdots$ O6    | 0.880 | 2.082        | 2.910(4)     | 156.4 | $-x, -y+1, -z+1$      |
| N6–H6 $\cdots$ O7    | 0.880 | 2.458        | 2.940(5)     | 114.9 | $-x+1, -y+1, -z+1$    |
| N9–H9 $\cdots$ O14   | 0.880 | 2.374        | 3.064(5)     | 135.4 | ...                   |
| N12–H12 $\cdots$ O16 | 0.880 | 2.161        | 2.894(4)     | 140.4 | $-x+1, -y, -z+1$      |
| N15–H15 $\cdots$ O10 | 0.880 | 2.208        | 3.041(6)     | 157.9 | $-x+1, -y+1, -z+1$    |
| N18–H18 $\cdots$ O17 | 0.880 | 2.130        | 2.902(5)     | 146.1 | $x, y, z+1$           |
